# Supplementary material
Source: MDPI journal article supplement (https://www.mdpi.com/1424-2818/13/11/577)
Supplement: s1 [file s1]

# Range expansion of treefrog species after previous declines in Costa Rica

Héctor Zumbado-Ulate<sup>1,\*</sup>, Catherine L. Searle<sup>1</sup>, Gerardo Chaves<sup>2</sup>, Víctor Acosta-Chaves<sup>3,4</sup>, Alex Shepack<sup>5</sup>, Stanley Salazar<sup>6</sup>, Adrián García-Rodríguez<sup>7</sup>

<sup>1</sup>Department of Biological Sciences, Purdue University; West Lafayette, Indiana, 47907

<sup>2</sup>CIBET (Museo de Zoología), Universidad de Costa Rica, San Pedro, 11501–2060 San José, Costa Rica

<sup>3</sup>Sede del Atlántico, Universidad de Costa Rica. Recinto de Paraíso, Cartago, Costa Rica.

<sup>4</sup>School for Field Studies, Center for Sustainable Development Studies, Atenas, Alajuela, Costa Rica.

<sup>5</sup>Department of Biological Sciences, University of Notre Dame, Notre Dame, IN 46556, USA

<sup>6</sup>Dosel S.A Rain Forest Adventures. La Esperanza, Horquetas de Sarapiquí, Heredia, Costa Rica.

<sup>7</sup>BioInvasions, Global Change, Macroecology-Group, Department of Botany and Biodiversity Research, University of Vienna, Rennweg 14, 1030, Vienna, Austria

\*Correspondence: hzumbado@purdue.edu

**Table S1.** Best-fitted candidate models selected to predict the range of eight species of treefrogs in Costa Rica. For each species we showed the total number of occurrences in raw and cleaned datasets, the candidate model selected, including feature classes (L, H, Q, and LHQ), regularization of multiplier values = 1-4 with increments of 1; the value of average test of the area under the receiver characteristic operator curve (AUC Mean), the lowest omission rate at minimum training presence (orMTP), and the equal training sensitivity and specificity threshold (ETSS) selected to generate our suitable habitat polygons.

| Species                          | Occurrence points |                 | Best-fitted model<br>(AUC; orMTP) | ETSS |
|----------------------------------|-------------------|-----------------|-----------------------------------|------|
|                                  | Raw dataset       | Cleaned dataset |                                   |      |
| <i>Agalychnis annae</i>          | 332               | 54              | L = 1 (0.82; 0.06)                | 0.24 |
| <i>Agalychnis lemur</i>          | 274               | 26              | H = 1 (0.73; 0.15)                | 0.6  |
| <i>Duellmanohyla uranochroa</i>  | 253               | 29              | H = 1 (0.56; 0.09)                | 0.6  |
| <i>Ecnomiohyla sukia</i>         | 32                | 26              | H = 1 (0.92; 0.07)                | 0.45 |
| <i>Isthmohyla angustilineata</i> | 91                | 11*             | L = 1 (0.80; 0.30)                | 0.6  |
| <i>Isthmohyla pictipes</i>       | 230               | 12*             | Q = 2 (0.78; 0.08)                | 0.6  |
| <i>Isthmohyla pseudopuma</i>     | 568               | 80              | L = 4 (0.61; 0.12)                | 0.6  |
| <i>Isthmohyla rivularis</i>      | 412               | 30              | L = 4 (0.78; 0.09)                | 0.6  |

\*For datasets with number of occurrences < 25 we used the 'N-1 Jackknife' as method of data partition instead of the 'block' method.

**Table S2.** Permutation importance (%) of the environmental predictors used to model the range of eight species of treefrogs in Costa Rica. The climatic predictors were BIO 02 = Mean Diurnal Range; BIO 03 = Isothermality; BIO 07 = Temperature Annual Range; BIO 08 = Mean Temperature of Wettest Quarter; BIO13 = Precipitation of Wettest Month; BIO 14 = Precipitation of Driest Month; BIO 18 = Precipitation of Warmest Quarter; BIO 19 = Precipitation of Coldest Quarter; CONT= Continentality; eQ = Emberger's pluviothermic quotient; PETWQ = Mean Monthly Potential Evapotranspiration of Warmest Quarter.

| Predictor | Permutation importance (%) |                         |                                 |                          |                                  |                            |                              |                             |
|-----------|----------------------------|-------------------------|---------------------------------|--------------------------|----------------------------------|----------------------------|------------------------------|-----------------------------|
|           | <i>Agalychnis annae</i>    | <i>Agalychnis lemur</i> | <i>Duellmanohyla uranochroa</i> | <i>Ecnomiohyla sukia</i> | <i>Isthmohyla angustilineata</i> | <i>Isthmohyla pictipes</i> | <i>Isthmohyla pseudopuma</i> | <i>Isthmohyla rivularis</i> |
| BIO 02    | 0.0                        | 10.0                    | 0.0                             | 0.0                      | 0.8                              | 0.0                        | 0.0                          | 0.0                         |
| BIO 03    | 52.0                       | 15.5                    | 27.0                            | 0.0                      | 0.0                              | 0.0                        | 28.1                         | 0.0                         |
| BIO 07    | 0.0                        | 0.0                     | 0.0                             | 29.8                     | 0.0                              | 0.0                        | 0.0                          | 0.0                         |
| BIO 08    | 0.0                        | 14.8                    | 0.0                             | 0.0                      | 0.0                              | 0.0                        | 0.0                          | 0.0                         |
| BIO 13    | 7.5                        | 5.9                     | 6.1                             | 14.2                     | 5.7                              | 0.0                        | 3.4                          | 0.0                         |
| BIO 14    | 0.1                        | 11.1                    | 17.5                            | 0.0                      | 0.0                              | 75.6                       | 4.6                          | 0.0                         |
| BIO 18    | 6.1                        | 11.7                    | 34.3                            | 26.8                     | 0.0                              | 0.0                        | 0.0                          | 0.0                         |
| BIO 19    | 5.0                        | 5.3                     | 2.1                             | 29.1                     | 64.0                             | 0.0                        | 14.8                         | 6.1                         |
| CONT      | 8.5                        | 14.0                    | 13.1                            | 0.1                      | 26.4                             | 24.4                       | 32.2                         | 92.8                        |
| eQ        | 21.0                       | 2.1                     | 0.0                             | 0                        | 3.2                              | 0.0                        | 16.9                         | 1.1                         |
| PETWQ     | 0.0                        | 9.6                     | 0.0                             | 0                        | 0.0                              | 0.0                        | 0.0                          | 0.0                         |
